1 Sequence variability, constraint and selection in the *CDI63* gene in pigs

2

3 Martin Johnsson<sup>1,2</sup>, Roger Ros-Freixedes<sup>1</sup>, Gregor Gorjanc<sup>1</sup>, Matt A. Campbell<sup>3</sup>, Sudhir

4 Naswa<sup>3</sup>, Kimberly Kelly<sup>3</sup>, Jonathon Lightner<sup>3</sup>, Steve Rounsley<sup>3</sup>, John M. Hickey<sup>1\*</sup>

5

6 <sup>1</sup> The Roslin Institute and Royal (Dick) School of Veterinary Studies, The University of

7 Edinburgh, Midlothian, EH25 9RG, Scotland, United Kingdom.

8 <sup>2</sup> Department of Animal Breeding and Genetics, Swedish University of Agricultural Sciences,

9 Box 7023, 750 07 Uppsala, Sweden.

10 <sup>3</sup> Genus plc, 1525 River Road, DeForest, WI 53532, USA.

11 \* Corresponding author: john.hickey@roslin.ed.ac.uk

12

## 13 Abstract

### 14 Background

15 In this paper, we investigate sequence variability, evolutionary constraint, and selection  
16 on the *CDI63* gene in pigs. The pig *CDI63* gene is required for infection by porcine  
17 reproductive and respiratory syndrome virus (PRRSV), a serious pathogen with major impact  
18 on pig production.

### 19 Results

20 We used targeted pooled sequencing of the exons of *CDI63* to detect sequence variants  
21 in 35,000 pigs of diverse genetic backgrounds and search for potential knock-out variants. We  
22 then used whole genome sequence data from three pig lines to calculate a variant intolerance  
23 score, which measures the tolerance of genes to protein coding variation, a selection test on

24 protein coding variation over evolutionary time, and haplotype diversity statistics to detect  
25 recent selective sweeps during breeding.

## 26 **Conclusions**

27 We performed a deep survey of sequence variation in the *CDI63* gene in domestic pigs.  
28 We found no potential knock-out variants. *CDI63* was moderately intolerant to variation, and  
29 showed evidence of positive selection in the lineage leading up to the pig, but no evidence of  
30 selective sweeps during breeding.

31

32 Key words: targeted sequencing, variant intolerance, positive selection, selective sweep,  
33 PRRSV

34

## 35 **Introduction**

36 In this paper, we investigate sequence variability, evolutionary constraint, and selection  
37 on the *CDI63* gene in pigs. The pig *CDI63* gene is required for infection by porcine  
38 reproductive and respiratory syndrome virus (PRRSV) [1], a serious pathogen with major  
39 impact on pig production [2]. PRRSV-resistant genome-edited pigs with modified *CDI63* have  
40 been developed, either by knocking out the gene completely or targeting only the fifth  
41 scavenger receptor cysteine-rich (SRCR) domain, which is the one that the virus exploits [3–  
42 6].

43 The physiological functions of *CDI63* include clearing of haemoglobin from blood  
44 plasma [7], adhesion of nucleated red blood cells to macrophages during red blood cell  
45 differentiation [8], and immune signalling [9–11]. When red blood cells rupture and  
46 haemoglobin is released into the blood stream, haemoglobin is bound by haptoglobin, and the  
47 haptoglobin—haemoglobin complex is taken up by macrophages using *CDI63* receptors on

48 their surface [7]. Since its natural function is receptor-mediated endocytosis, *CDI63* is a target  
49 for pathogens entering cells. At least one other virus, the simian hemorrhagic fever virus [12],  
50 has independently evolved to target *CDI63*.

51         Given that genome editing of *CDI63* has led to PRRVS-resistant pigs, we wanted to  
52 see if natural loss-of-function variants for the *CDI63* gene could be identified in elite pigs, in  
53 order to investigate the opportunity to develop PRRSV resistance from within existing breeding  
54 programs. The aims of this paper were to survey *CDI63* sequence variation for such naturally  
55 occurring knock-out variants, and to put *CDI63* variability in the genomic context of genomic  
56 variant intolerance and selection. We used targeted pooled sequencing of the exons of *CDI63*  
57 to detect sequence variants in 35,000 pigs of diverse genetic backgrounds. We then used whole  
58 genome sequence data from three pig lines to put the *CDI63* results in the context of the whole  
59 genome. We used three complementary population genetic analyses: a variant intolerance  
60 score, which measures the tolerance of genes to protein coding variation; a selection test on  
61 protein coding variation over evolutionary time; and haplotype diversity statistics to detect  
62 recent selective sweeps during breeding.

63         In summary, our results show that there were no potential knock-out variants in *CDI63*  
64 in these pigs. Furthermore, *CDI63* was moderately intolerant to variation, and showed  
65 evidence of positive selection in the lineage leading up to the pig, but no evidence of selective  
66 sweeps during breeding.

67

## 68 **Materials and Methods**

69         We used targeted *CDI63* exon sequence data from pools of 35,000 pigs of diverse  
70 origins, and whole genome sequence data from three lines of pigs from the PIC breeding  
71 programme. We used three complementary population genetic analyses: 1) residual variant

72 intolerance score based on segregating exonic SNPs; 2) a gene-based selection test  
73 incorporating synonymous and nonsynonymous divergence between the pig and cattle  
74 reference genomes; and 3) a selective sweep statistic based on haplotype diversity in imputed  
75 whole-genome sequence data from one of the lines.

76

## 77 Data

78 We used targeted exon sequencing of the *CD163* gene from 35,000 pigs. The sample  
79 included nine lines from the breeding programme of the Pig Improvement Company (PIC).  
80 The DNA samples were previously collected in 2011-2016 as part of the operation of the  
81 breeding programme.

82 To put the targeted sequence data in a genomic context, we used whole-genome  
83 sequence data from three lines of pigs of the PIC breeding programme. These lines were also  
84 sampled in the targeted exome sequencing. We used 1146 individuals from line 1, sequenced  
85 at variable coverages. 84 of them were sequenced at 30X coverage, 11 at 10X coverage, 45 at  
86 5X coverage, 561 at 2X coverage, and the remaining 445 at 1X coverage. The individuals and  
87 their sequence coverages were chosen with the AlphaSeqOpt algorithm [13,14], with the  
88 addition of sires that contributed a large proportion of the genotyped progeny in line 1 that  
89 were genotyped as part of the routine breeding activities of PIC. We used 408 individuals from  
90 line 2, and 638 individuals from line 3, all of them sequenced at 2X coverage. These individuals  
91 were sires that contributed a large proportion of the genotyped progeny in lines 2 and 3 that  
92 were genotyped as part of the routine breeding activities of PIC.

93

## 94 Targeted sequencing of *CD163*

95 We used a hierarchical pooling strategy to be able to sequence *CD163* exons in many  
96 individuals cost-effectively. We pooled 96 DNA samples into one combined DNA sample and

97 constructed a shotgun sequencing library using the ThruPLEX Tag-seq kit from Rubicon  
98 Genomics. This kit incorporates unique molecular identifiers that allow for a consensus  
99 sequence to be generated from reads originating from the same molecule thus reducing the  
100 impact of sequencing errors. 24 such barcoded libraries were combined and used as input into  
101 a sequence capture reaction using baits designed against the exons of *CDI63* gene (Arbor  
102 Biosciences, Ann Arbor, MI). The product of the library capture was then used to generate  
103 2x150bp reads on an Illumina MiSeq sequencer. This pooling scheme allowed us to sequence  
104 up to 2304 samples per sequencing run. In total, 35,808 animals were sampled using this  
105 scheme.

106 We aligned reads with bwa mem (v 0.7.15-r1140) [15] against the 10.2 version of the  
107 pig genome with an added 33 kbp contig representing the *CDI63* genomic region, which was  
108 missing from this version of the reference genome. The coding sequence of *CDI63* on this  
109 contig is identical to the sequence in the version 11.1 of the pig reference genome. We used  
110 Connor (<https://github.com/umich-brcf-bioinf/Connor>) to call consensus sequences from reads  
111 with the same unique molecular identifier. We called variants from these consensus alignments  
112 using the LoFreq variant caller [16]. We used snpEff [17] to classify the variants as  
113 synonymous, nonsynonymous and stop gain variants.

114

#### 115 Validation of potential knock-out variants

116 The potential stop gain variants detected in the pooled targeted sequencing data were  
117 validated by sequencing of individual animals. We went back to the pools where the variants  
118 were detected and sequenced amplicons of the appropriate exons from all the samples making  
119 up the pool with individual barcodes on the MiSeq. None of the potential stop gain variants  
120 were validated by individual sequencing.

121

## 122 Whole-genome sequence data processing

123 We aligned reads to the pig genome (Sscrofa11.1) with bwa mem [15], removed  
124 duplicates with Picard (<https://broadinstitute.github.io/picard/index.html>), and called variants  
125 with the GATK HaplotypeCaller [18]. We filtered and processed variant call format files with  
126 VCFtools [19].

127 We used the Variant Effect Predictor [20] to find the protein-coding SNPs, and  
128 classifying them into synonymous and nonsynonymous SNPs. We used the Ensembl gene  
129 annotation [21], version 90. We downloaded variants in *CDI63* from the Ensembl variation  
130 database.

131

## 132 Residual variant intolerance score

133 The residual variant intolerance score [22] measures gene-level tolerance to mutations  
134 by counting segregating variants. To calculate the residual variant intolerance, we counted the  
135 number of nonsynonymous variants and the total number of variants in each gene, and  
136 calculated the studentised residual of the regression between them. We included variants that  
137 segregated in at least one of the three lines.

138 We applied residual variant intolerance score both at the level of the gene, and at the  
139 level of the protein domain [23], using protein domains found by identifying Pfam profiles in  
140 Ensembl protein sequences with PfamScan [24]. All gene-level analyses were performed on  
141 the principal transcript as designated with APPRIS annotation [25].

142

## 143 Selection analysis in lineage leading up to the pig

144 SnIPRE [26] uses a Poisson model to measure gene-level selection based on between-  
145 species divergence and within-species polymorphism. We calculated the divergence between  
146 the pig and cattle (UMD 3.1.1) reference genomes using the Nei-Gojobori method [27] which

147 finds the number of potential synonymous and nonsynonymous substitutions between two  
148 codons. We aligned the reference genomes using Lastz [28], and refined the alignments using  
149 the chain/net method [29]. We excluded all codons that were not fully aligned between  
150 genomes, that is, any codon containing an alignment gap or a missing base in any of the  
151 genomes. We ran the empirical Bayes implementation of SnIPRE, using the lme4 R package  
152 [30].

153

#### 154 **Selective sweep analysis by haplotype diversity**

155 We estimated haplotype diversity at CD163, at random 100 control genes of similar  
156 length, and at 11 homologs of genes that are stably expressed in humans [31]. The control  
157 genes were selected at random from genes of similar genomic length as CD163 (at most 10%  
158 difference).

159 We imputed genome-wide sequence data to 65,000 pigs from line 1, using SNP chip  
160 genotypes from 60K or a 15K SNP chip and the line 1 sequence data described above. We  
161 extracted mapped read counts supporting each allele from low coverage samples, as outlined  
162 in [Ros-Freixedes et al, in prep], and used multilocus hybrid peeling [32], as implemented in  
163 AlphaPeel, to phase and impute all individuals to full sequence data in windows around the  
164 selected genes.

165 We extracted all variants falling within exons and introns of the gene in the reference  
166 genome and identified haplotypes carried by each individual in each gene, including only  
167 genotyped individuals. For variants encompassing each gene, including introns, strings of  
168 phased alleles were compared to define haplotypes carried by each individual in each parental  
169 chromosome. Strings of alleles that were identical (with a mismatch threshold) between two  
170 individuals were considered the same haplotype, and strings with multiple mismatches were  
171 considered as different haplotypes. A maximum of two allele mismatches were allowed before

172 two strings were considered different haplotypes to account for sequencing or phasing errors.  
173 We then calculated haplotype homozygosities based on the pooled frequency of the two most  
174 common haplotypes ( $H_{12}$ ) [33].

175

## 176 Gene Ontology enrichment

177 We downloaded Gene Ontology Biological Process terms for Ensembl genes from  
178 BioMart [34], and ranked enriched biological processes by the p-value from Fisher's Exact  
179 test.

180

## 181 Results

### 182 *CDI63* sequence variants identified

183 We used a hierarchical pooling strategy to sequence the exons of *CDI63* from over  
184 35,000 pigs from nine lines, and *CDI63* variants from whole-genome sequencing of 1146, 638,  
185 and 408 pigs from three of the same lines.

186 Targeted sequencing of exons identified 140 single nucleotide variants in *CDI63*.  
187 Whole genome sequencing in three lines identified 15 single nucleotide variants in *CDI63*,  
188 two of which were nonsynonymous, the rest synonymous, and no potential knock-out variants.  
189 Table 1 shows the numbers of synonymous and nonsynonymous single nucleotide variants  
190 found in each dataset, and the overlap between them. Figure 1 shows the locations of variants  
191 in the *CDI63* protein sequence and their frequencies in targeted and whole-genome  
192 sequencing.

193 The targeted sequencing also identified 14 potential knock-out variants. We followed  
194 up on these variants by performing individual sequencing of the animals constituting the pool  
195 from which the potential knock-out variant was identified. In this way, we ruled out all the



196 potential knock-out variants as false positives, likely caused by polymerase errors during  
197 amplification before incorporation of unique molecular identifiers.

198 The *CDI63* variants detected in whole genome sequence data of the three pig lines were  
199 mostly concordant with the targeted sequencing. The discordant SNPs found in the whole  
200 genome sequence data were rare. There is one nonsynonymous shared variant, K851R, which  
201 occurs at high minor allele frequency. Out of the sequence variants detected, 10 of the variants,  
202 most of them at higher frequency, were already present in the Ensembl variation database.

203

#### 204 Residual variant intolerance score

205 *CDI63* was not among the most variant intolerant genes, as measured by a residual  
206 variant intolerance score. Figure 2 shows the distributions of gene-level and protein domain-  
207 level residual variant intolerance scores with the position of *CDI63* and its five variable  
208 domains. *CDI63* ranked as number 894 out of 17,982 variable autosomal genes. The five  
209 variable SRCR domains of *CDI63* ranked as 1037 (domain 9), 2686 (domain 7), number 8125  
210 (domains 2 and 6), and 14,147 (domain 8) out of 19,930 variable protein domains, as measured  
211 by residual variant intolerance score applied to protein domains identified with the Pfam  
212 database.

213 We used the bottom 2% of the genome-wide residual variant intolerance distribution to  
214 highlight 358 variant intolerant genes. They were enriched for basal cellular processes such as  
215 microtubule-based movement, cell adhesion, and calcium ion transport (Figure 3).

216

#### 217 Selection in the lineage leading up to the pig

218 *CDI63* showed evidence of positive selection in the lineage leading up to the pig, as  
219 estimated by the SnIPRE model. Figure 4 shows the selection estimates from the SnIPRE  
220 model, highlighting positively and negatively selected genes and the position of *CDI63*. We

221 found a total of 1125 putatively selected genes, 778 positively selected genes, and 347  
222 putatively negatively selected. Positively selected genes in the lineage leading up to pig were  
223 enriched for cell surface receptor signalling, proteolysis, protein phosphorylation and terms  
224 related to lipids (Figure 3).

225

## 226 Selective sweep analysis

227 We investigated haplotype diversity in *CDI63* in one of the lines using imputed whole  
228 genome sequence data. *CDI63* showed no evidence of recent selective sweep. We calculated  
229 the selective sweep test statistic  $H_{12}$ , and compared it to 100 randomly selected control genes  
230 of similar length. Figure 5 shows  $H_{12}$  at *CDI63*, the 100 control genes, a set of homologs of  
231 genes that are stably expressed in humans, and randomly selected genes labelled as intolerant  
232 by their residual variant intolerance score.

233

## 234 Discussion

235 In this paper, we investigated sequence variability, evolutionary constraint, and  
236 selection on the *CDI63* gene in pigs. We identified synonymous and nonsynonymous variants,  
237 but no potential knock-out variants in the gene. We found that *CDI63* is relatively tolerant to  
238 variation, shows evidence of positive selection in the lineage leading up to the pig, and no  
239 evidence of selective sweeps during breeding. In the light of these results, we will discuss (i)  
240 variant intolerance scores; (ii) selection on *CDI63* in the lineage leading up to the pig; (iii) the  
241 lack of evidence of selective sweeps; and (iv) technical aspects of the targeted exome  
242 sequencing method.

243

## 244 Residual variant intolerance score

245 Variant intolerance scores measure the lack or excess of common nonsynonymous  
246 variants in a gene [22]. A low variant intolerance score for a gene indicates that its sequence is  
247 constrained, and correlates with gene essentiality [35]. The intermediate variant intolerance  
248 scores of *CDI63* suggest that it is moderately constrained in the pig.

249 The 2% extreme tail of the variant intolerance distribution was enriched for genes  
250 related to microtubule-based movement. This is consistent with an enrichment of microtubule-  
251 genes in human essential genes [35].

252

## 253 Selection in the lineage leading up to the pig

254 The SnIPRE model is a generalized mixed linear model that estimates the selection  
255 effect on each gene with the number of fixed nonsynonymous substitutions compared to an  
256 outgroup species [26]. A positive selection estimate means that when comparing the pig to the  
257 cow, there has been significantly more nonsynonymous fixed substitutions than expected under  
258 neutrality. The synonymous sites are assumed to be under negligible selection. The positive  
259 selection effect for *CDI63* suggests that its sequence is quite flexible, and has rapidly evolved  
260 in the lineage leading up to the pig. Rapid evolution of *CDI63* is consistent with its known role  
261 in infection. The estimated positive selection on other cell surface genes, including the T cell  
262 surface proteins *CD3*, *CD5* and *CD8* and immunoglobulin E receptor *FCERIA*, is consistent  
263 with previous observations of rapid immune gene evolution in pigs [36].

264

## 265 Selective sweep analysis

266 Selective sweeps occur when the fixation of one or more beneficial variants affects the  
267 allele frequencies at linked sites [37]. This signal of recent selection can be detected from  
268 population genetics data. When the beneficial variant is already present in the population as

269 standing variation, selection may give rise to a so called soft sweep, which may be more  
270 difficult to detect than a sweep arising from a new mutation [38]. Since selection on standing  
271 variation is the expectation in animal breeding, we used a statistic designed to detect soft  
272 sweeps [33]. The lack of a selective sweep at *CDI63* suggest that this gene has not been a  
273 target of strong recent selection during pig breeding. However, selective sweep analysis cannot  
274 rule the possibility that *CDI63* variants could have small effects on some quantitative trait that  
275 may have been subjected to subtle allele frequency shifts by selection.

276

### 277 Technical aspects of the targeted exon sequencing

278 Targeted exome sequencing of pooled samples is a feasible way to cost efficiently  
279 sequence a gene in many individuals. However, as our unsuccessful validation of potential stop  
280 gain variants show, this method suffers from low frequency false positives, likely due to  
281 polymerase errors before incorporation of unique molecular identifiers. The targeted exon  
282 sequencing and whole genome sequencing are in good agreement about higher frequency  
283 variants, but since the targeted sequencing sampled a wider span of pig diversity, the rare  
284 variant calls may represent genuine rare variants or sequencing errors. However, with the depth  
285 of sequencing and validation, we are confident that there are no natural knock-out variants in  
286 *CDI63* in these pigs.

287

### 288 Conclusions

289 We performed a deep survey of sequence variation in the *CDI63* gene in domestic pigs.  
290 We found no potential knock-out variants. *CDI63* was moderately intolerant to variation, and  
291 showed evidence of positive selection in the lineage leading up to the pig, but no evidence of  
292 selective sweeps during breeding.

293

## 294 **Funding**

295 The authors acknowledge the financial support from the BBSRC ISPG to The Roslin  
296 Institute BBS/E/D/30002275, from Grant Nos. BB/N015339/1, BB/L020467/1,  
297 BB/M009254/1, from Genus PLC, Innovate UK, and from the Swedish Research Council  
298 Formas Dnr 2016-01386.

## 299 **Author's contributions**

300 SR, MJ, JMH, JL, MAC, and GG conceived the study. SN and KK performed  
301 experiments. MJ, RRF, SN and SR analysed data. MJ, JMH, RRF and SR wrote the paper. All  
302 authors read and approved the final manuscript.

## 303 **Acknowledgements**

304 This work has made use of the resources provided by the Edinburgh Compute and Data  
305 Facility (ECDF) (<http://www.ecdf.ed.ac.uk>).

306

## 307 **References**

308 1. Calvert JG, Slade DE, Shields SL, Jolie R, Mannan RM, Ankenbauer RG, et al.  
309 CD163 expression confers susceptibility to porcine reproductive and respiratory syndrome  
310 viruses. *J. Virol. Am Soc Microbiol*; 2007;81:7371–9.

311 2. Holtkamp DJ, Kliebenstein JB, Neumann EJ, Zimmerman JJ, Rotto HF, Yoder TK,  
312 et al. Assessment of the economic impact of porcine reproductive and respiratory syndrome  
313 virus on United States pork producers. *J. Swine Heal. Prod.* 2013;21:72–84.

314 3. Wells KD, Bardot R, Whitworth KM, Tribble BR, Fang Y, Mileham A, et al.  
315 Replacement of porcine CD163 scavenger receptor cysteine-rich domain 5 with a CD163-Like  
316 homolog confers resistance of pigs to genotype 1 but not genotype 2 porcine reproductive and

- 317 respiratory syndrome virus. *J. Virol. Am Soc Microbiol*; 2017;91:e01521-16.
- 318 4. Whitworth KM, Rowland RRR, Ewen CL, Tribble BR, Kerrigan MA, Cino-Ozuna  
319 AG, et al. Gene-edited pigs are protected from porcine reproductive and respiratory syndrome  
320 virus. *Nat. Biotechnol. Nature Research*; 2016;34:20–2.
- 321 5. Whitworth KM, Lee K, Benne JA, Beaton BP, Spate LD, Murphy SL, et al. Use of  
322 the CRISPR/Cas9 system to produce genetically engineered pigs from in vitro-derived oocytes  
323 and embryos. *Biol. Reprod. Oxford University Press*; 2014;91:71–8.
- 324 6. Yang H, Zhang J, Zhang X, Shi J, Pan Y, Zhou R, et al. CD163 knockout pigs are  
325 fully resistant to highly pathogenic porcine reproductive and respiratory syndrome virus.  
326 *Antiviral Res. Elsevier*; 2018;
- 327 7. Kristiansen M, Graversen JH, Jacobsen C, Sonne O, Hoffman H-J, Law SKA, et al.  
328 Identification of the haemoglobin scavenger receptor. *Nature. Nature Publishing Group*;  
329 2001;409:198–201.
- 330 8. Fabriek BO, Polfliet MMJ, Vloet RPM, van der Schors RC, Ligtenberg AJM,  
331 Weaver LK, et al. The macrophage CD163 surface glycoprotein is an erythroblast adhesion  
332 receptor. *Blood. Am Soc Hematology*; 2007;109:5223–9.
- 333 9. Bover LC, Cardó-Vila M, Kuniyasu A, Sun J, Rangel R, Takeya M, et al. A  
334 previously unrecognized protein-protein interaction between TWEAK and CD163: potential  
335 biological implications. *J. Immunol. Am Assoc Immunol*; 2007;178:8183–94.
- 336 10. Van den Heuvel MM, Tensen CP, van As JH, Van den Berg TK, Fluitsma DM,  
337 Dijkstra CD, et al. Regulation of CD 163 on human macrophages: cross-linking of CD163  
338 induces signaling and activation. *J. Leukoc. Biol. Soc Leukocyte Biology*; 1999;66:858–66.
- 339 11. Philippidis P, Mason JC, Evans BJ, Nadra I, Taylor KM, Haskard DO, et al.  
340 Hemoglobin scavenger receptor CD163 mediates interleukin-10 release and heme oxygenase-  
341 1 synthesis. *Circ. Res. Am Heart Assoc*; 2004;94:119–26.

- 342           12. Cai Y, Postnikova EN, Bernbaum JG, Yú S, Mazur S, Deiuliis NM, et al. Simian  
343 hemorrhagic fever virus cell entry is dependent on CD163 and uses a clathrin-mediated  
344 endocytosis-like pathway. *J. Virol. Am Soc Microbiol*; 2015;89:844–56.
- 345           13. Gonen S, Ros-Freixedes R, Battagin M, Gorjanc G, Hickey JM. A method for the  
346 allocation of sequencing resources in genotyped livestock populations. *Genet. Sel. Evol.*  
347 *BioMed Central*; 2017;49:47.
- 348           14. Ros-Freixedes R, Gonen S, Gorjanc G, Hickey JM. A method for allocating low-  
349 coverage sequencing resources by targeting haplotypes rather than individuals. *Genet. Sel.*  
350 *Evol. BioMed Central*; 2017;49:78.
- 351           15. Li H. Aligning sequence reads, clone sequences and assembly contigs with BWA-  
352 MEM. *arXiv Prepr. arXiv1303.3997*. 2013;
- 353           16. Wilm A, Aw PPK, Bertrand D, Yeo GHT, Ong SH, Wong CH, et al. LoFreq: a  
354 sequence-quality aware, ultra-sensitive variant caller for uncovering cell-population  
355 heterogeneity from high-throughput sequencing datasets. *Nucleic Acids Res. Oxford*  
356 *University Press*; 2012;40:11189–201.
- 357           17. Cingolani P, Platts A, Wang LL, Coon M, Nguyen T, Wang L, et al. A program for  
358 annotating and predicting the effects of single nucleotide polymorphisms, SnpEff: SNPs in the  
359 genome of *Drosophila melanogaster* strain w1118; iso-2; iso-3. *Fly (Austin)*. Taylor & Francis;  
360 2012;6:80–92.
- 361           18. McKenna A, Hanna M, Banks E, Sivachenko A, Cibulskis K, Kernytsky A, et al.  
362 The Genome Analysis Toolkit: a MapReduce framework for analyzing next-generation DNA  
363 sequencing data. *Genome Res. Cold Spring Harbor Lab*; 2010;20:1297–303.
- 364           19. Danecek P, Auton A, Abecasis G, Albers CA, Banks E, DePristo MA, et al. The  
365 variant call format and VCFtools. *Bioinformatics. Oxford University Press*; 2011;27:2156–8.
- 366           20. McLaren W, Gil L, Hunt SE, Riat HS, Ritchie GRS, Thormann A, et al. The

- 367 ensembl variant effect predictor. *Genome Biol. BioMed Central*; 2016;17:122.
- 368 21. Aken BL, Achuthan P, Akanni W, Amode MR, Bernsdorff F, Bhai J, et al. Ensembl  
369 2017. *Nucleic Acids Res. Oxford University Press*; 2016;45:D635–42.
- 370 22. Petrovski S, Wang Q, Heinzen EL, Allen AS, Goldstein DB. Genic intolerance to  
371 functional variation and the interpretation of personal genomes. *PLoS Genet. Public Library of  
372 Science*; 2013;9:e1003709.
- 373 23. Gussow AB, Petrovski S, Wang Q, Allen AS, Goldstein DB. The intolerance to  
374 functional genetic variation of protein domains predicts the localization of pathogenic  
375 mutations within genes. *Genome Biol. BioMed Central*; 2016;17:9.
- 376 24. Finn RD, Coggill P, Eberhardt RY, Eddy SR, Mistry J, Mitchell AL, et al. The Pfam  
377 protein families database: towards a more sustainable future. *Nucleic Acids Res. Oxford  
378 University Press*; 2016;44:D279–85.
- 379 25. Rodriguez JM, Maietta P, Ezkurdia I, Pietrelli A, Wesselink J-J, Lopez G, et al.  
380 APPRIS: annotation of principal and alternative splice isoforms. *Nucleic Acids Res. Oxford  
381 University Press*; 2012;41:D110–7.
- 382 26. Eilertson KE, Booth JG, Bustamante CD. SnIPRE: selection inference using a  
383 Poisson random effects model. *PLoS Comput. Biol. Public Library of Science*;  
384 2012;8:e1002806.
- 385 27. Nei M, Gojobori T. Simple methods for estimating the numbers of synonymous and  
386 nonsynonymous nucleotide substitutions. *Mol. Biol. Evol.* 1986;3:418–26.
- 387 28. Harris RS. Improved pairwise alignment of genomic DNA. The Pennsylvania State  
388 University; 2007.
- 389 29. Kent WJ, Baertsch R, Hinrichs A, Miller W, Haussler D. Evolution's cauldron:  
390 duplication, deletion, and rearrangement in the mouse and human genomes. *Proc. Natl. Acad.  
391 Sci. National Acad Sciences*; 2003;100:11484–9.



- 392           30. Bates D, Mächler M, Bolker B, Walker S. Fitting linear mixed-effects models using  
393 lme4. arXiv Prepr. arXiv1406.5823. 2014;
- 394           31. Eisenberg E, Levanon EY. Human housekeeping genes, revisited. Trends Genet.  
395 Elsevier; 2013;29:569–74.
- 396           32. Whalen A, Ros-Freixedes R, Wilson DL, Gorjanc G, Hickey JM. Hybrid peeling  
397 for fast and accurate calling, phasing, and imputation with sequence data of any coverage in  
398 pedigrees. bioRxiv. Cold Spring Harbor Laboratory; 2017;228999.
- 399           33. Garud NR, Messer PW, Buzbas EO, Petrov DA. Recent selective sweeps in North  
400 American *Drosophila melanogaster* show signatures of soft sweeps. PLoS Genet. Public  
401 Library of Science; 2015;11:e1005004.
- 402           34. Smedley D, Haider S, Durinck S, Pandini L, Provero P, Allen J, et al. The BioMart  
403 community portal: an innovative alternative to large, centralized data repositories. Nucleic  
404 Acids Res. Oxford University Press; 2015;43:W589–98.
- 405           35. Bartha I, di Iulio J, Venter JC, Telenti A. Human gene essentiality. Nat. Rev. Genet.  
406 Nature Publishing Group; 2017;nrg-2017.
- 407           36. Groenen MAM, Archibald AL, Uenishi H, Tuggle CK, Takeuchi Y, Rothschild  
408 MF, et al. Analyses of pig genomes provide insight into porcine demography and evolution.  
409 Nature. Nature Research; 2012;491:393–8.
- 410           37. Smith JM, Haigh J. The hitch-hiking effect of a favourable gene. Genet. Res.  
411 (Camb). Cambridge University Press; 1974;23:23–35.
- 412           38. Hermisson J, Pennings PS. Soft sweeps. Genetics. Genetics Soc America;  
413 2005;169:2335–52.
- 414
- 415
- 416

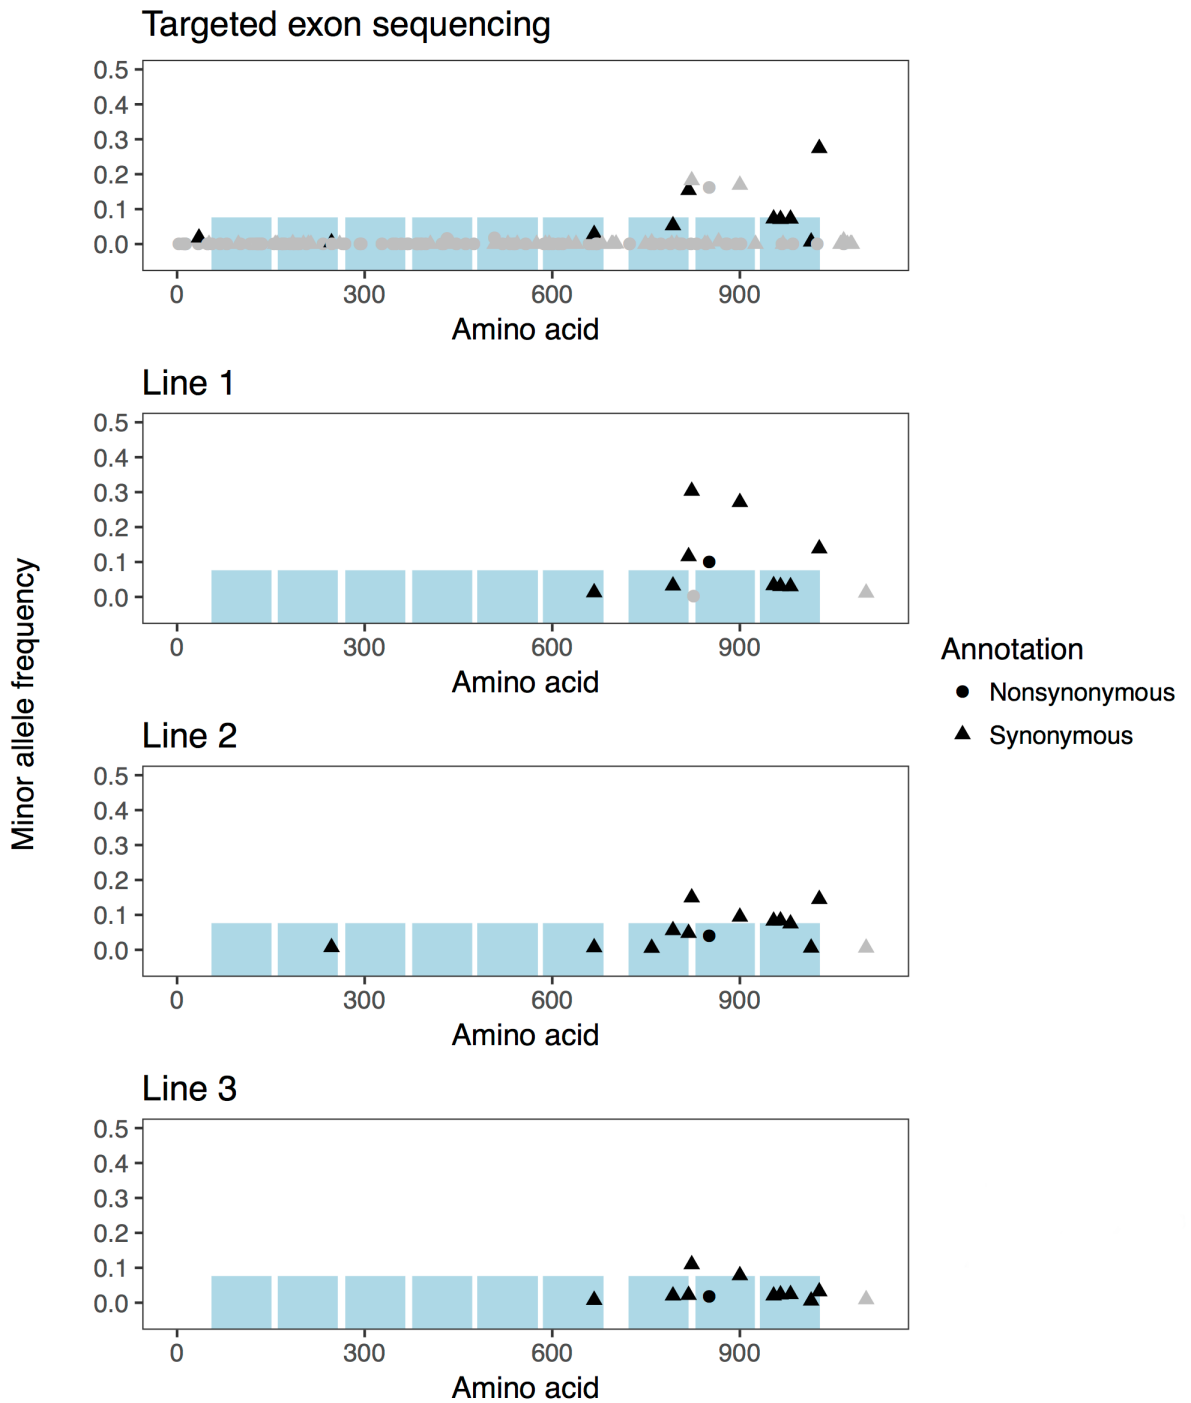

417

418 *Figure 1: Protein-coding SNPs in CD163 in targeted exon sequencing and whole genome*

419 *sequencing of three lines. Minor allele frequency showing that discordant variants are rare.*

420 *Grey and black coloured points indicate replication. Grey dots in targeted sequencing are*

421 *variants not present in the Ensembl variation database. Grey dots in the whole genome*

422 *sequenced lines are variants not replicated by the targeted exon sequencing. The blue boxes*

423 *represent SRCR domains.*

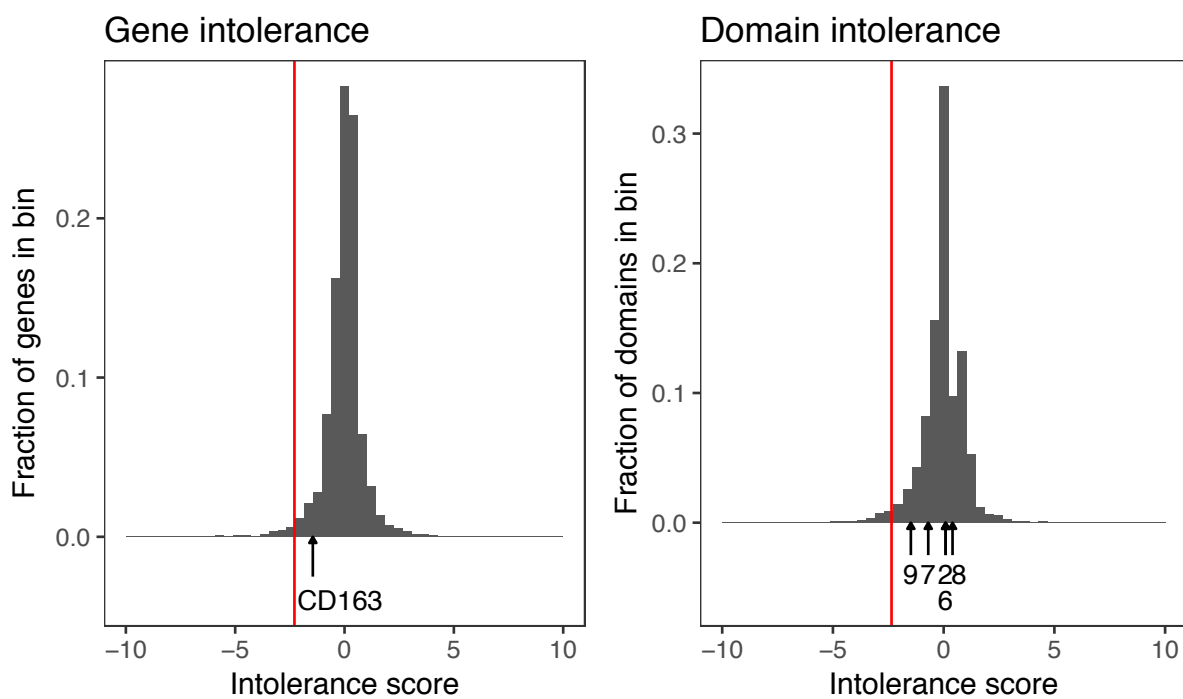

424

425 *Figure 2: Residual variant intolerance score distributions with CD163 highlighted. The red*

426 *line is the 2% threshold, and arrows indicate the position of CD163 and five of its SRCR*

427 *domains.*

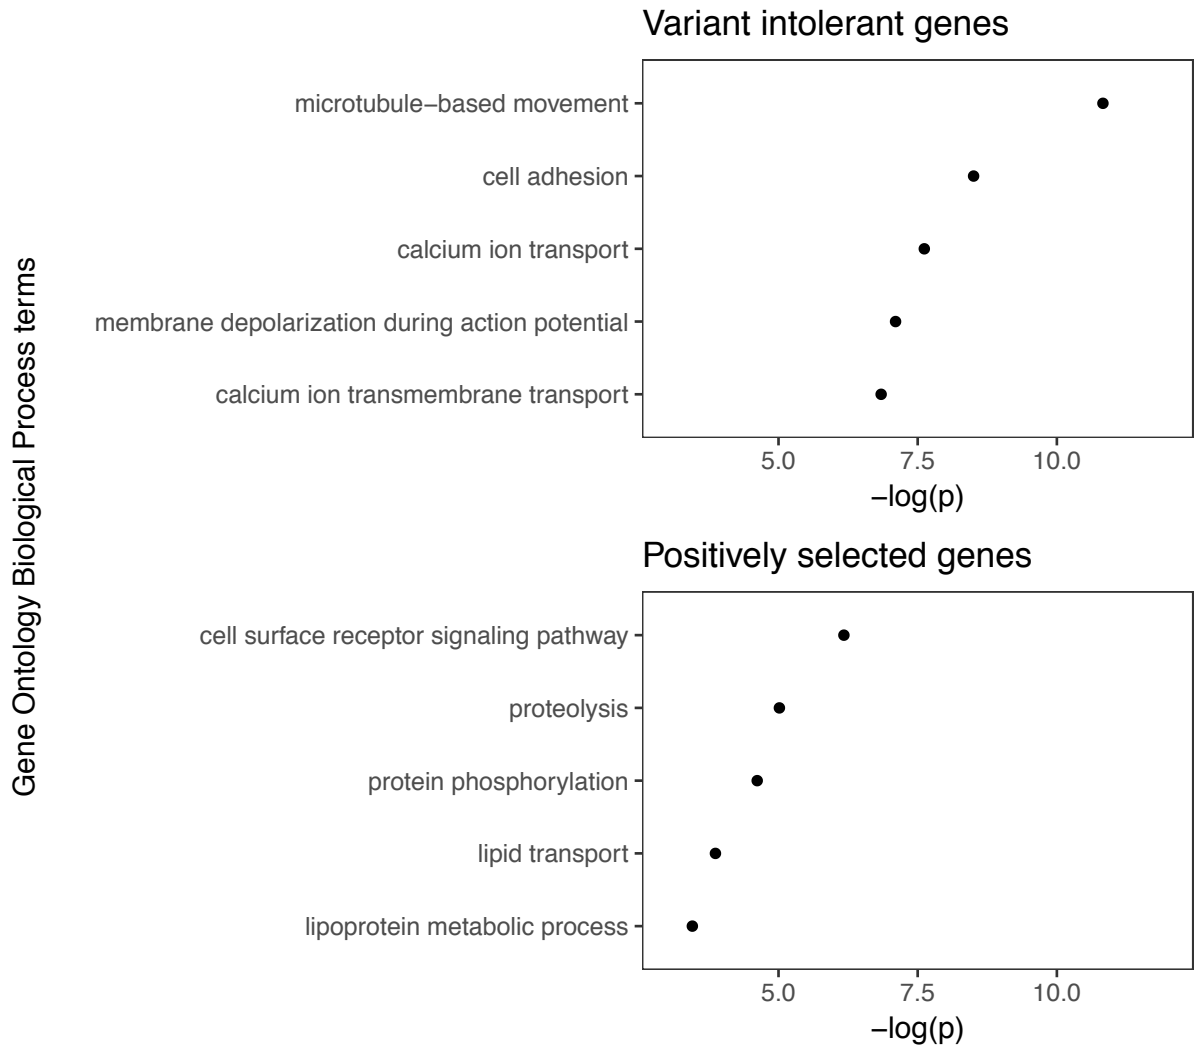

428

429 *Figure 3: The five most enriched Gene Ontology Biological Process terms in variant intolerant*  
430 *genes and positively selected genes, with the negative logarithm of the p-value of Fisher's exact*  
431 *test.*

432

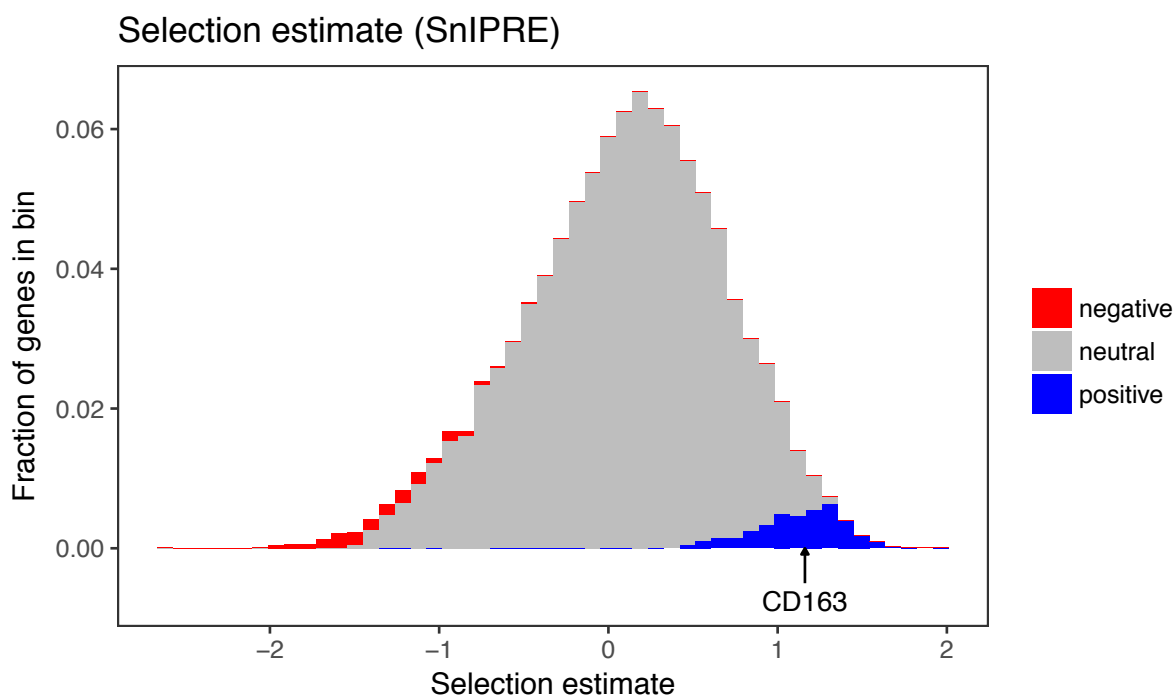

433

434 *Figure 4: SnIPRE selection estimates. The arrow indicates the position of CD163, which is one*

435 *of the potentially positively selected (blue) genes.*

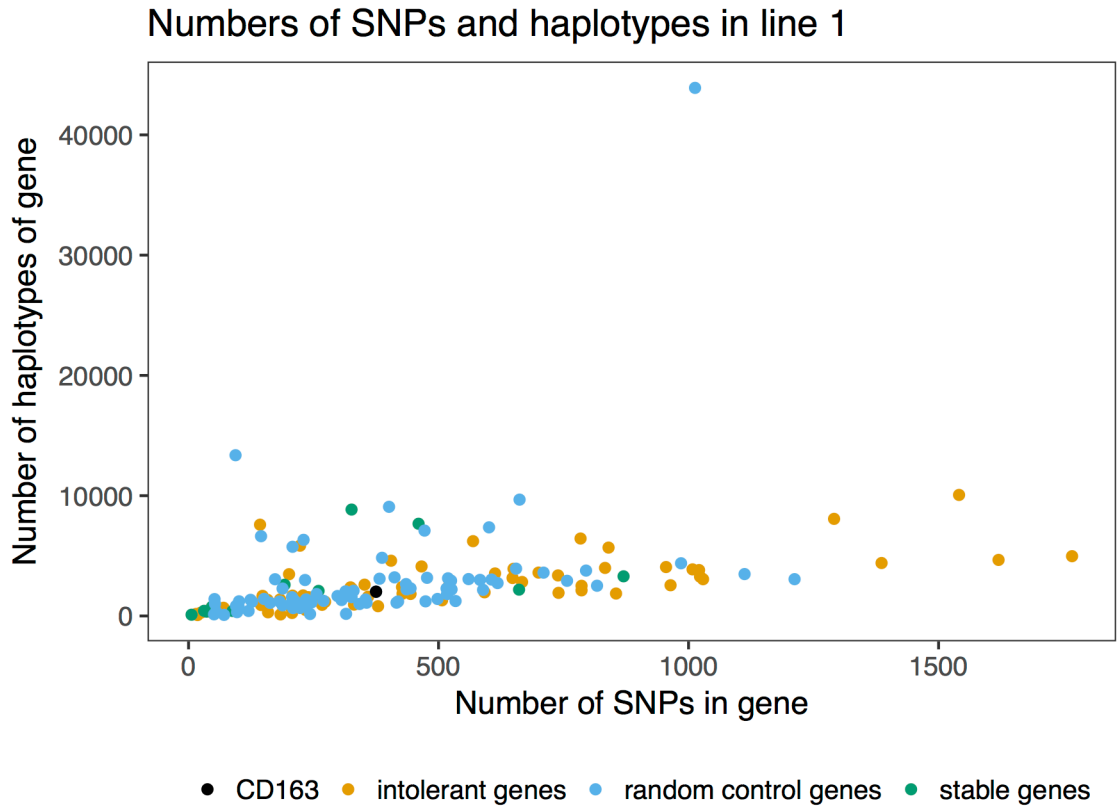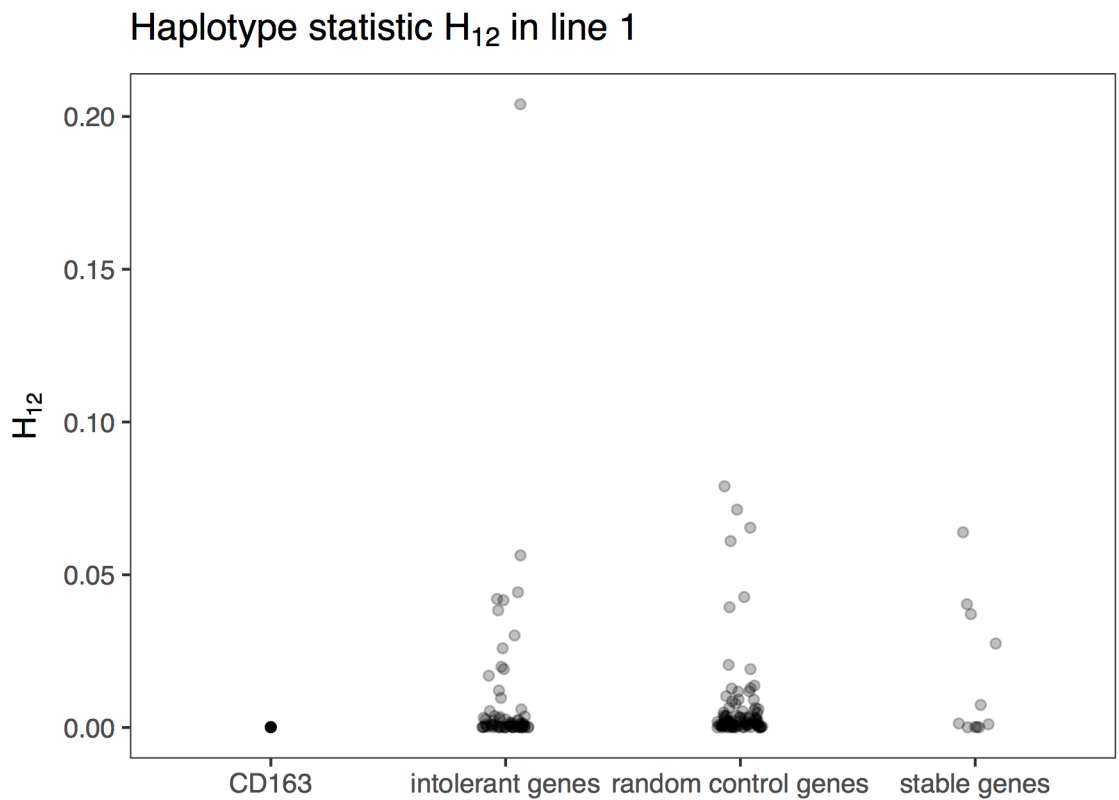

436

437 *Figure 5: Number of haplotypes, number of SNPs in gene, and selective sweep statistic  $H_{12}$  of*

438 *CD163, 100 control genes of similar length, 100 intolerant genes with low residual variant*

439 *intolerance score, and 11 control genes that are homologs of human genes with stable*  
440 *expression across many tissues.*

441 *Table 1: Number of pairwise shared SNPs between variant sets.*

|                 | <i>Synonymous</i> |               |               |               | <i>Nonsynonymous</i> |               |               |               |
|-----------------|-------------------|---------------|---------------|---------------|----------------------|---------------|---------------|---------------|
|                 | <i>Targeted</i>   | <i>Line 1</i> | <i>Line 2</i> | <i>Line 3</i> | <i>Targeted</i>      | <i>Line 1</i> | <i>Line 2</i> | <i>Line 3</i> |
| <i>Targeted</i> | 49                | 9             | 12            | 10            | 91                   | 1             | 1             | 1             |
| <i>Line 1</i>   |                   | 10            | 10            | 11            |                      | 2             | 1             | 1             |
| <i>Line 2</i>   |                   |               | 13            | 10            |                      |               | 1             | 1             |
| <i>Line 3</i>   |                   |               |               | 11            |                      |               |               | 1             |

442
